# Supplementary material for: A Comprehensive Survey of the Roles of Highly Disordered Proteins in Type 2 Diabetes
Source: PubMed Central journal article supplement (PMC5666700; doi:10.3390/ijms18102010), 2017-09-21
Supplement: ijms-18-02010-s001.pdf [file ijms-18-02010-s001.pdf]

## Supplementary Materials

### A Comprehensive Survey of the Roles of Highly Disordered Proteins in Type 2 Diabetes

Zhihua Du <sup>1,2\*</sup> and Vladimir N. Uversky<sup>1,3,4\*</sup>

<sup>1</sup> Department of Molecular Medicine, Morsani College of Medicine, University of South Florida, 12901 Bruce B. Downs Blvd. MDC07, Tampa, Florida, USA; E-mail:

[vuversky@health.usf.edu](mailto:vuversky@health.usf.edu) (V.N.U.);

<sup>2</sup> Shenzhen University, Guangdong Province, P.R. China; E-Mail: [duzh@szu.edu.cn](mailto:duzh@szu.edu.cn);

<sup>3</sup> USF Health Byrd Alzheimer's Research Institute, Morsani College of Medicine, University of South Florida, 12901 Bruce B. Downs Blvd. MDC07, Tampa, Florida, USA;

<sup>4</sup> Laboratory of New Methods in Biology, Institute for Biological Instrumentation, Russian Academy of Sciences, Institutskaya str., Pushchino, Moscow region 142290, Russia;

\* Authors to whom correspondence should be addressed; Z.D.: Tel: + 86-134-8063-9937; E-mail: [duzh@szu.edu.cn](mailto:duzh@szu.edu.cn); V. N. U.: Tel: + 01-813-974-5816. Fax: +01-813-974-7357. E-mail: [vuversky@health.usf.edu](mailto:vuversky@health.usf.edu)

**Table S1.** Major disorder-related characteristics of human T2DM-related proteins.

| Protein                             | UniProt ID | Protein length (NAIBS) <sup>a</sup> | PONDR-FIT <sup>b</sup> | MobiDB consensus <sup>c</sup> | Location (length) of long disordered regions <sup>d</sup>                                                                                                                                              | Location (length) of AIBS <sup>e</sup>                                                                                                                                                                                                                                                                                                                                                                                                                                         | N <sub>int</sub> <sup>f</sup> | MoRF <sup>h</sup>                                                                                     |
|-------------------------------------|------------|-------------------------------------|------------------------|-------------------------------|--------------------------------------------------------------------------------------------------------------------------------------------------------------------------------------------------------|--------------------------------------------------------------------------------------------------------------------------------------------------------------------------------------------------------------------------------------------------------------------------------------------------------------------------------------------------------------------------------------------------------------------------------------------------------------------------------|-------------------------------|-------------------------------------------------------------------------------------------------------|
| IRS2 (Insulin receptor substrate 2) | Q9Y4H2     | 1338 (27/56.9)                      | 75.63                  | 74.81                         | 1-31 (31)<br>49-72 (24)<br>303-411 (109)<br>428-537 (110)<br>840-928 (89)<br>935-1101 (167)<br>1121-1296 (176)                                                                                         | 29-53 (25)<br>92-101 (10)<br>111-120 (10)<br>290-299 (10)<br>322-343 (22)<br>347-363 (17)<br>372-457 (86)<br>469-519 (51)<br>535-578 (44)<br>595-614 (20)<br>685-702 (18)<br>742-753 (12)<br>760-767 (8)<br>783-788 (6)<br>798-810 (13)<br>816-836 (21)<br>849-857 (9)<br>876-907 (32)<br>917-962 (46)<br>970-987 (18)<br>995-1018 (24)<br>1038-1087 (50)<br>1095-1125 (31)<br>1131-1196 (66)<br>1205-1262 (58)<br>1282-1304 (23)<br>1317-1338 (22)                            | 58                            | 31-51<br>71-84<br>571-577<br>917-924<br>1073-1076<br>1106-1110<br>1130-1138<br>1247-1259<br>1320-1338 |
| MAFA (Transcription factor MAFA)    | Q8NHW3     | 353 (8/64.6)                        | 73.4                   | 57.2                          | 35-112 (78)<br>143-164 (22)<br>167-225 (59)<br>319-353 (35)                                                                                                                                            | 1-7 (7)<br>16-31 (16)<br>41-50 (10)<br>54-71 (18)<br>106-255 (150)<br>266-275 (10)<br>309-316 (8)<br>345-353 (9)                                                                                                                                                                                                                                                                                                                                                               | 12                            | 305-327<br>329-337<br>346-355<br>365-369                                                              |
| IRS1 (Insulin receptor substrate 1) | P35568     | 1243 (32/58.1)                      | 70.7                   | 72.62                         | 115-158 (44)<br>268-434 (167)<br>442-460 (19)<br>494-507 (14)<br>522-695 (174)<br>704-725 (22)<br>736-755 (20)<br>765-890 (126)<br>918-984 (67)<br>1005-1018 (14)<br>1028-1154 (127)<br>1188-1242 (55) | 26-34 (9)<br>84-89 (6)<br>107-113 (7)<br>275-289 (15)<br>295-348 (54)<br>354-393 (40)<br>403-413 (11)<br>424-432 (9)<br>436-445 (10)<br>461-472 (12)<br>478-489 (12)<br>499-529 (31)<br>539-597 (59)<br>602-676 (75)<br>688-708 (21)<br>722-736 (15)<br>759-772 (14)<br>787-806 (20)<br>813-874 (62)<br>881-886 (6)<br>894-927 (34)<br>940-965 (26)<br>971-980 (10)<br>987-1002 (16)<br>1008-1037 (30)<br>1050-1063 (14)<br>1067-1079 (13)<br>1082-1096 (15)<br>1111-1127 (17) | 107                           | 6-35<br>41-54<br>548-553<br>894-902<br>1146-1152<br>1177-1186<br>1224-1241                            |

|                                                                           |        |                    |       |       |                                                                                                              |                                                                                                                                                                                                                                                                                                                                                                       |     |                                                                                                                                                                                               |
|---------------------------------------------------------------------------|--------|--------------------|-------|-------|--------------------------------------------------------------------------------------------------------------|-----------------------------------------------------------------------------------------------------------------------------------------------------------------------------------------------------------------------------------------------------------------------------------------------------------------------------------------------------------------------|-----|-----------------------------------------------------------------------------------------------------------------------------------------------------------------------------------------------|
|                                                                           |        |                    |       |       |                                                                                                              | 1143-1156 (14)<br>1164-1192 (29)<br>1222-1237 (16)                                                                                                                                                                                                                                                                                                                    |     |                                                                                                                                                                                               |
| PDX1 (Pancreas/ duodenum homeobox protein 1)                              | P52945 | 283<br>(8/46)      | 60.4  | 67.1  | 19-82 (64)<br>84-109 (26)<br>200-283 (84)                                                                    | 6-22 (17)<br>30-38 (9)<br>52-60 (9)<br>71-93 (23)<br>159-169 (11)<br>181-196 (16)<br>224-239 (16)<br>247-275 (29)                                                                                                                                                                                                                                                     | 20  | 3-17<br>188-201<br>233-265                                                                                                                                                                    |
| IRS4 (Insulin receptor substrate 4)                                       | O14654 | 1,257<br>(22/39.1) | 64.4  | 58.79 | 406-653 (248)<br>678-921 (244)<br>1179-1257 (79)                                                             | 22-31 (10)<br>425-439 (15)<br>452-470 (19)<br>482-499 (18)<br>512-527 (16)<br>543-597 (55)<br>604-626 (23)<br>647-693 (47)<br>700-728 (29)<br>736-751 (16)<br>775-789 (15)<br>802-821 (20)<br>825-852 (28)<br>888-902 (15)<br>917-928 (12)<br>942-965 (24)<br>1047-1060 (14)<br>1092-1100 (9)<br>1130-1141 (12)<br>1154-1183 (30)<br>1190-1215 (26)<br>1235-1257 (23) | 138 | 95-99<br>413-416<br>430-437<br>487-494<br>579-583<br>608-623<br>646-664<br>698-706<br>741-747<br>776-785<br>808-811<br>829-832<br>890-900<br>1018-1021<br>1155-1166<br>1218-1229<br>1236-1256 |
| ADIPO (Adiponectin)                                                       | Q15848 | 244<br>(4/24.5)    | 38.93 | 30.74 | 16-25 (10)<br>40-101 (62)                                                                                    | 1-15 (15)<br>26-45 (20)<br>71-81 (11)<br>109-118 (10)                                                                                                                                                                                                                                                                                                                 | 9   | N.P.                                                                                                                                                                                          |
| PIK3R5 (Phosphoinositide 3-kinase regulatory subunit 5)                   | Q8WYR1 | 880<br>(7/13.6)    | 36.7  | 29.2  | 312-349 (38)<br>351-370 (20)<br>386-418 (33)<br>437-515 (79)<br>563-603 (41)<br>783-793 (11)<br>838-858 (21) | 339-364 (26)<br>371-387 (17)<br>420-435 (16)<br>451-463 (13)<br>485-495 (11)<br>516-536 (21)<br>547-562 (16)                                                                                                                                                                                                                                                          | 8   | 416-434<br>555-565                                                                                                                                                                            |
| SoCS1 (Suppressor of cytokine signaling 1)                                | O15524 | 210<br>(2/13.3)    | 34.6  | 25.1  | 1-53 (53)                                                                                                    | 1-16 (16)<br>71-81 (11)                                                                                                                                                                                                                                                                                                                                               | 71  | 1-26                                                                                                                                                                                          |
| PIK3R2 (Phosphatidylinositol 3-kinase regulatory subunit beta)            | O00459 | 728<br>(12/21.42)  | 34.07 | 27.65 | 81-120 (40)<br>140-153 (14)<br>189-213 (25)<br>251-285 (35)<br>289-324 (36)<br>544-560 (17)<br>714-728 (15)  | 29-43 (15)<br>70-84 (15)<br>109-118 (10)<br>122-136 (15)<br>169-183 (15)<br>218-231 (14)<br>241-256 (16)<br>277-298 (22)<br>312-320 (9)<br>325-335 (11)<br>395-400 (6)<br>574-581 (8)                                                                                                                                                                                 | 148 | 1-21<br>330-335                                                                                                                                                                               |
| SoCS3 (Suppressor of cytokine signaling 3)                                | O14543 | 225<br>(4/22.7)    | 32.0  | 29.3  | 101-112 (12)<br>130-163 (34)                                                                                 | 96-101 (6)<br>116-128 (13)<br>163-182 (20)<br>185-196 (12)                                                                                                                                                                                                                                                                                                            | 86  | 20-25<br>116-126<br>160-178<br>213-224                                                                                                                                                        |
| VDCC (Voltage-dependent L-type calcium channel subunit alpha-1C, CACNA1C) | Q13936 | 2,221<br>(20/13.8) | 28.3  | 24.63 | 73-98 (26)<br>449-477 (29)<br>763-859 (97)<br>2191-2221 (31)                                                 | 1-11 (11)<br>30-40 (11)<br>47-66 (20)<br>802-827 (26)<br>1743-1760 (18)<br>1768-1779 (12)<br>1795-1808 (14)                                                                                                                                                                                                                                                           | 24  | 1-2<br>505-510<br>2101-2102<br>2207-2219                                                                                                                                                      |

|                                                                               |        |                   |       |       |                                                                                                                             |                                                                                                                                                                                                                                     |     |                                        |
|-------------------------------------------------------------------------------|--------|-------------------|-------|-------|-----------------------------------------------------------------------------------------------------------------------------|-------------------------------------------------------------------------------------------------------------------------------------------------------------------------------------------------------------------------------------|-----|----------------------------------------|
|                                                                               |        |                   |       |       |                                                                                                                             | 1815-1837 (23)<br>1846-1861 (16)<br>1867-1875 (9)<br>1883-1895 (13)<br>1930-1944 (15)<br>1969-1988 (20)<br>2000-2023 (24)<br>2067-2079 (13)<br>2096-2101 (6)<br>2116-2141 (26)<br>2144-2154 (11)<br>2175-2184 (10)<br>2214-2221 (8) |     |                                        |
| SoCS4 (Suppressor of cytokine signaling 4)                                    | Q8WXH5 | 440<br>(2/3.9)    | 26.1  | 20.4  | 1-36 (36)<br>38-50 (13)                                                                                                     | 29-38 (10)<br>141-147 (7)                                                                                                                                                                                                           | 22  | 23-41<br>119-127<br>141-152<br>427-437 |
| PRKCE (Protein kinase C epsilon type)                                         | Q02156 | 737<br>(4/5.5)    | 21.4  | 18.1  | 136-163 (28)<br>310-341 (32)<br>348-364 (17)<br>373-400 (28)                                                                | 299-307 (9)<br>321-327 (7)<br>355-371 (17)<br>406-413 (8)                                                                                                                                                                           | 81  | 38-44<br>682-687                       |
| SoCS2 (Suppressor of cytokine signaling 2)                                    | O14508 | 198<br>(2/12.1)   | 20.7  | 18.7  | 1-31 (31)<br>136-145 (10)                                                                                                   | 1-8 (8)<br>36-51 (16)                                                                                                                                                                                                               | 24  | 1-5<br>19-22                           |
| JNK9 (Mitogen-activated protein kinase 9, MAPK9)                              | P45984 | 424<br>(3/12)     | 18.4  | 18.2  | 366-424 (59)                                                                                                                | 320-325 (6)<br>352-362 (11)<br>391-424 (34)                                                                                                                                                                                         | 143 | 270-279<br>321-326<br>352-356          |
| PRKCZ (Protein kinase C zeta type)                                            | Q05513 | 592<br>(2/3.7)    | 18.2  | 13.2  | 1-15 (15)<br>186-205 (20)<br>213-228 (16)                                                                                   | 21-32 (12)<br>577-586 (10)                                                                                                                                                                                                          | 130 | 554-562<br>566-585                     |
| INS (insulin)                                                                 | P01308 | 110<br>(0/0)      | 16.3  | 28.2  | 55-83 (29)                                                                                                                  | N.P. <sup>h</sup>                                                                                                                                                                                                                   | 27  | 48-50                                  |
| GCK (Glucokinase)                                                             | P35557 | 465<br>(2/2.2)    | 15.7  | 6.9   | 1-12 (12)                                                                                                                   | 19-23 (5)<br>125-129 (5)                                                                                                                                                                                                            | 14  | 1-7<br>273-274                         |
| JNK10 (Mitogen-activated protein kinase 10, MAPK10)                           | P53779 | 464<br>(3/11.2)   | 15.5  | 23.1  | 1-44 (44)<br>402-464 (63)                                                                                                   | 356-363 (8)<br>390-399 (10)<br>431-464 (34)                                                                                                                                                                                         | 52  | N.P.                                   |
| JNK8 (Mitogen-activated protein kinase 8, MAPK8)                              | P45983 | 427<br>(5/11.7)   | 15.4  | 21.31 | 366-379 (14)<br>380-427 (48)                                                                                                | 319-324 (6)<br>352-363 (12)<br>377-387 (11)<br>397-402 (6)<br>413-427 (15)                                                                                                                                                          | 226 | 320-326                                |
| PYK (Protein-tyrosine kinase 2-beta)                                          | Q14289 | 1,009<br>(6/6.73) | 14.46 | 14.97 | 1-11 (11)<br>14-23 (10)<br>363-376 (14)<br>693-734 (42)<br>755-769 (15)<br>779-793 (15)<br>852-869 (18)                     | 347-352 (6)<br>676-683 (8)<br>729-751 (23)<br>768-779 (12)<br>801-809 (9)<br>879-888 (10)                                                                                                                                           | 386 | 9-16                                   |
| INSR (Insulin receptor)                                                       | P06213 | 1,382<br>(9/7.4)  | 14.03 | 14.76 | 1-9 (9)<br>471-481 (11)<br>565-574 (10)<br>682-709 (28)<br>742-767 (26)<br>778-797 (20)<br>1119-1131 (13)<br>1305-1382 (78) | 654-659 (6)<br>669-678 (10)<br>732-743 (12)<br>766-780 (15)<br>804-822 (19)<br>1081-1087 (6)<br>1284-1201 (8)<br>1347-1365 (18)<br>1369-1377 (9)                                                                                    | 136 | 737-743<br>752-756<br>1348-1381        |
| TNF- $\alpha$ (Tumor necrosis factor)                                         | P01375 | 233<br>(3/13.7)   | 12.44 | 18.88 | 1-9 (9)<br>12-26 (15)<br>79-89 (11)<br>177-185 (9)                                                                          | 31-52 (22)<br>132-136 (5)<br>229-233 (5)                                                                                                                                                                                            | 138 | 1-8<br>196-197                         |
| MAPK3 (ERK1, Mitogen-activated protein kinase 3, MAPK3)                       | P27361 | 379<br>(1/1.3)    | 11.87 | 9.23  | 1-27 (27)                                                                                                                   | 1-5 (5)                                                                                                                                                                                                                             | 276 | 1-2<br>329-332                         |
| Kir6.2 or IKATP (Inward rectifier K(+) channel Kir6.2 or ATP-sensitive inward | Q14654 | 390<br>(0/0)      | 11.79 | 8.21  | 366-390 (25)                                                                                                                | N.P.                                                                                                                                                                                                                                | 18  | 7-8<br>34-37<br>365-389                |

|                                                                                         |        |                   |      |      |                                                               |                                                           |     |                                      |
|-----------------------------------------------------------------------------------------|--------|-------------------|------|------|---------------------------------------------------------------|-----------------------------------------------------------|-----|--------------------------------------|
| rectifier potassium channel 11)                                                         |        |                   |      |      |                                                               |                                                           |     |                                      |
| GLUT4 (Solute carrier family 2, facilitated glucose transporter member 4)               | P14672 | 509<br>(1/0.98)   | 9.6  | 9.0  | 1-18 (18)<br>63-72 (10)<br>494-509 (16)                       | 26-30                                                     | 51  | 498-507                              |
| mTOR (Serine/threonine-protein kinase mTOR)                                             | P42345 | 2,549<br>(4/1.3)  | 8.9  | 8.0  | 1-18 (18)<br>910-930 (21)<br>1815-1866 (52)<br>2437-2491 (55) | 19-27 (9)<br>263-272 (10)<br>298-304 (7)<br>1748-1754 (7) | 175 | N.P.                                 |
| SUR1 (Sulfonylurea receptor 1; ATP-binding cassette sub-family C member 8)              | Q09428 | 1,581<br>(2/1.1)  | 8.85 | 6.58 | 621-641 (21)<br>744-761 (18)<br>987-935 (53)                  | 678-686 (9)<br>920-928 (9)                                | 6   | N.P.                                 |
| MAPK1 (Mitogen-activated protein kinase 1)                                              | P28482 | 360<br>(0/0)      | 8.1  | 5.3  | 1-11 (11)<br>353-360 (8)                                      | N.P.                                                      | 329 | 308-319<br>338-359                   |
| IKKA (Inhibitor of nuclear factor kappa-B kinase subunit alpha )                        | O15111 | 745<br>(2/2.6)    | 7.38 | 6.31 | 1-15 (15)                                                     | 713-723 (11)<br>738-745 (8)                               | 186 | 738-744                              |
| GLUT2 (Solute carrier family 2, facilitated glucose transporter member 2)               | P11168 | 524<br>(0/0)      | 6.3  | 5.53 | 277-288 (12)                                                  | N.P.                                                      | 6   | N.P.                                 |
| PRKCD (Protein kinase C delta type)                                                     | Q05655 | 676<br>(1/0.3)    | 5.8  | 6.8  | 297-312 (16)<br>620-630 (11)                                  | 4-5 (2)                                                   | 178 | 1-7<br>605-613<br>620-625<br>633-639 |
| PIK3CB (Phosphatidylinositol 4,5-bisphosphate 3-kinase catalytic subunit beta isoform)  | P42338 | 1,070<br>(2/0.65) | 3.36 | 2.06 | 521-529 (9)                                                   | 286-286 (1)<br>400-405 (6)                                | 53  | N.P.                                 |
| PIK3CA (Phosphatidylinositol 4,5-bisphosphate 3-kinase catalytic subunit alpha isoform) | P42336 | 1,068<br>(0/0)    | 3.00 | 2.06 | 1-7 (7)<br>534-538 (5)                                        | 479-480 (2)                                               | 101 | N.P.                                 |

Table is colored to indicate disorder status of analyzed proteins. Following the accepted practice, two arbitrary cutoffs for the levels of intrinsic disorder are used to classify proteins as highly ordered (PIDR<10% blue), moderately disordered (10%≤PIDR< 30%, pink) and highly disordered (PIDR≥30%, red) (50).

<sup>a</sup> N<sub>AIBS</sub> (A/B) represents the number of potential disorder-based binding sites identified by the ANCHOR algorithm (A) and the percentage of residues involved in disorder-based interactions (B).

<sup>b</sup> Content of disordered residues (i.e., residues with the disorder propensity ≥0.5) in a protein based on the PONDR-FIT disorder prediction.

<sup>c</sup> Content of predicted disordered residues in a protein based on the MobiDB consensus score.

<sup>d</sup> Information on long disordered regions (i.e., disordered regions of at least 10 residues) was obtained based on the MobiDB consensus profile.

<sup>e</sup> AIBSs are potential disorder-based binding sites identified by the ANCHOR algorithm.

<sup>f</sup> N<sub>int</sub>, number of interactions as found using the Agile Protein Interactomes DataServer (<http://cicblade.dep.usal.es:8080/APID/init.action>).
